# Supplementary material for: Cerebellar Cells Self-Assemble into Functional Organoids on Synthetic, Chemically Crosslinked ECM-Mimicking Peptide Hydrogels
Source: MDPI journal article supplement (doi:10.3390/biom10050754), 2020-05-12
Supplement: s1 [file s1]

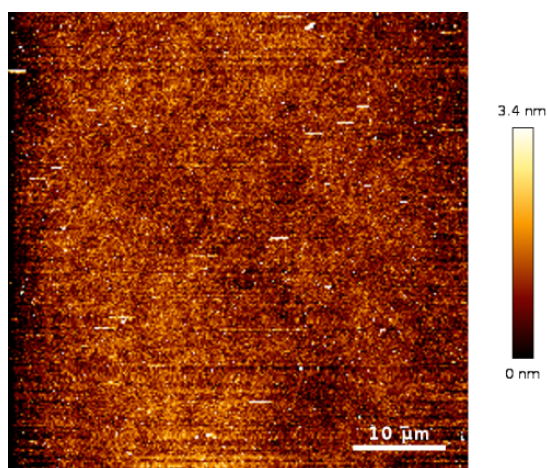

**Supplementary Figure S1.** Representative AFM topography image of a glass surface treated with (3-aminopropyl) trimethoxy silane (APTMS) and subsequently modified with glutaraldehyde (GA). The image was recorded in PBS pH 7.4 buffer solution.
